# Supplementary material for: Development of a Bispecific Antibody-Based Platform for Retargeting of Capsid Modified AAV Vectors
Source: MDPI journal article supplement (doi:10.3390/ijms22158355), 2021-08-03
Supplement: s1 [file s1]

## Supplementary Material

# Development of a bispecific antibody-based platform for retargeting of capsid modified AAV vectors

Juliane Kuklik <sup>1</sup>, Stefan Michelfelder <sup>2</sup>, Felix Schiele <sup>3</sup>, Sebastian Kreuz <sup>2,4</sup>, Thorsten Lamla <sup>5</sup>, Philipp Müller <sup>4,†</sup> and John E. Park <sup>1,\*</sup>

<sup>1</sup> Division of Cancer Immunology and Immune Modulation, Boehringer Ingelheim Pharma GmbH & Co. KG, 88387 Biberach an der Riss, Germany; juliane.kuklik@boehringer-ingelheim.com

<sup>2</sup> Division of Research Beyond Borders, Boehringer Ingelheim Pharma GmbH & Co. KG, 88387 Biberach an der Riss, Germany; stefan.michelfelder@boehringer-ingelheim.com (S.M.); sebastian.kreuz@boehringer-ingelheim.com (S.K.)

<sup>3</sup> Division of Biotherapeutics Discovery, Boehringer Ingelheim Pharma GmbH & Co. KG, 88387 Biberach an der Riss, Germany; felix.schiele@boehringer-ingelheim.com

<sup>4</sup> Boehringer Ingelheim Venture Fund GmbH, 55216 Ingelheim am Rhein, Germany; philipp\_3.mueller@boehringer-ingelheim.com

<sup>5</sup> Division of Drug Discovery Sciences Biberach, Boehringer Ingelheim Pharma GmbH & Co. KG, 88387 Biberach an der Riss, Germany; thorsten.lamla@boehringer-ingelheim.com

\* Correspondence: john.park@boehringer-ingelheim.com

† These authors contributed equally to this work.

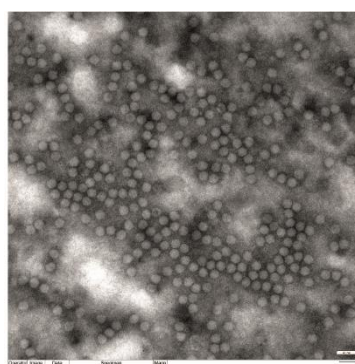

**Figure 1.** Transmission electron microscopy of negative stained rAAV-2E3.v6 viral particles, un-cropped image. Scalebar 50  $\mu$ m.

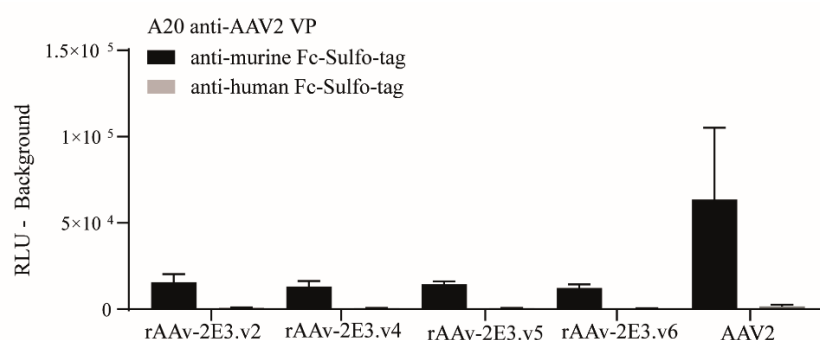

**Figure 2.** MSD ELISA control staining of immobilized rAAV-2E3.v2, -v4, -v5, -v6 and AAV2 following incubation with A20 anti-VP antibody and anti-murine Fc-Sulfo-tag secondary antibody. Loading control of Figure 2E. The secondary anti-human Fc-Sulfo-tag was used as isotype control. Data represent mean + SD of three independent experiments.

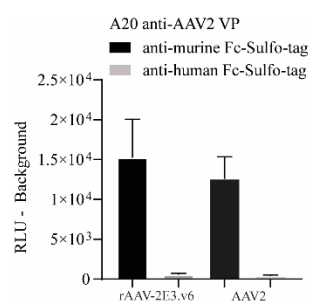

**Figure 3.** MSD ELISA control staining of immobilized rAAV-2E3.v6 and AAV2 following incubation with A20 anti-VP antibody and anti-murine Fc-Sulfo-tag secondary antibody. Loading control of Figure 4D The secondary anti-human Fc-Sulfo-tag was used as isotype control. Data show mean  $\pm$  SD of three independent experiments.

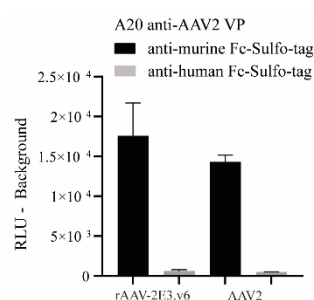

**Figure 4.** MSD ELISA control staining immobilized rAAV-2E3.v6 and AAV2 following incubation with A20 anti-VP antibody and anti-murine Fc-Sulfo-tag secondary antibody, loading control of Figure 7C. The secondary anti-human Fc-Sulfo-tag was used as isotype control. Data show mean  $\pm$  SD of two independent experiments.

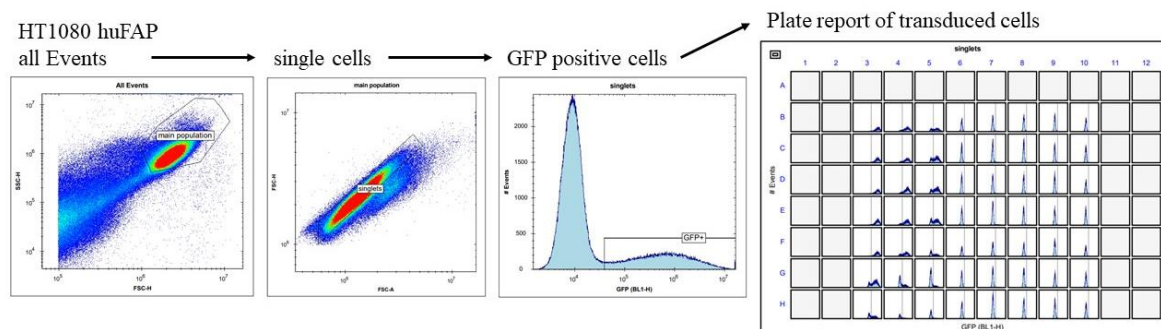

**Figure 5.** Exemplary overview of the flow cytometry gating strategy of HT1080 huFAP cells after transduction with a titration of rAAV-2E3.v6 and KiH-2E3-MO36. Cells were gated for GFP positive single cells. Flow cytometry and data analysis was performed using the iQue® Screener PLUS (IntelliCyt Cooperation) and ForeCyt® Software (IntelliCyt Cooperation).
